# Supplementary material for: Printable electronics-compatible silicon nanoparticles prepared by the facile decomposition of SiS2 and their application in a back-to-back Schottky diode
Source: Royal Society of Chemistry journal article supplement (doi:10.1039/c2jm35349k), 2012-01-01
Supplement: c2jm35349k.pdf [file c2jm35349k.pdf]

1 **Supporting information**

2 **Printable Electronics-Compatible Silicon Nanoparticles Prepared by**  
3 **the Facile Decomposition of SiS<sub>2</sub> and its Application in a back-to-**  
4 **back Schottky Diode**

5 **Priyesh V. More<sup>ab</sup>, Sunho Jeong<sup>b</sup>, Ji-yoon Lee<sup>b</sup>, Yeong-Hui Seo<sup>b</sup>, Beyong-Hwan Ryu<sup>\*a,b</sup> and**  
6 **Youngmin Choi<sup>\*a,b</sup>**

7

8

9

10

11

12

13

14

15

16

17

18

19

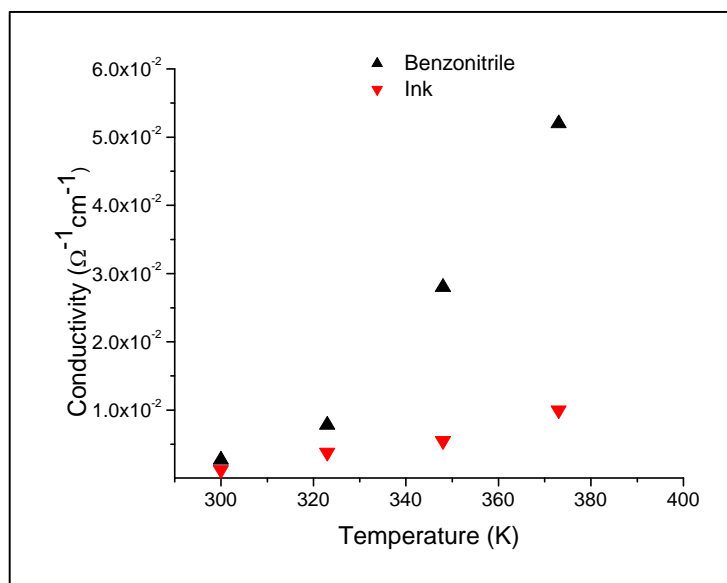

16 **S.I. Figure 1:** Conductivity of silicon nanoparticles films at various temperatures. The conductivity was measured under  
17 constant applied bias field.

20

21

22

23

24

25

26

27

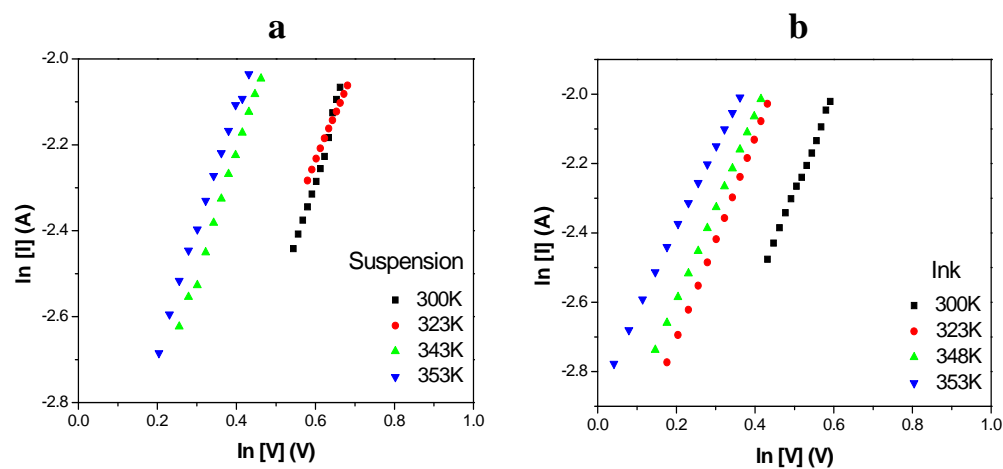

28

**S.I. Figure 2:** Plots of  $\ln(I-V)$  of a) the suspension and b) the ink sample at various temperatures. The  $m$  value was obtained

29

by calculating the slope of the linear portion from the plot.

30

31

32

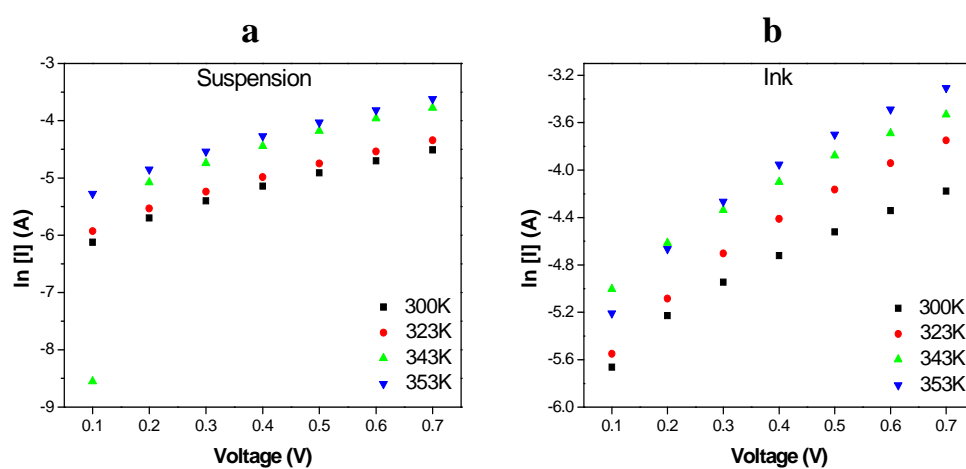

38

**S.I. Figure 3:** Plots of  $\ln(I)$  vs.  $V$  of a) the suspension and b) ink sample at various temperatures. The value of  $n$  can be

40

calculated directly from the slope of the plot  $\ln I-V$ , while  $I_0$  is the intercept of  $\ln(I)$ .

41

42

43

44

45

46

47

48

49

50

51

52

53

54

55

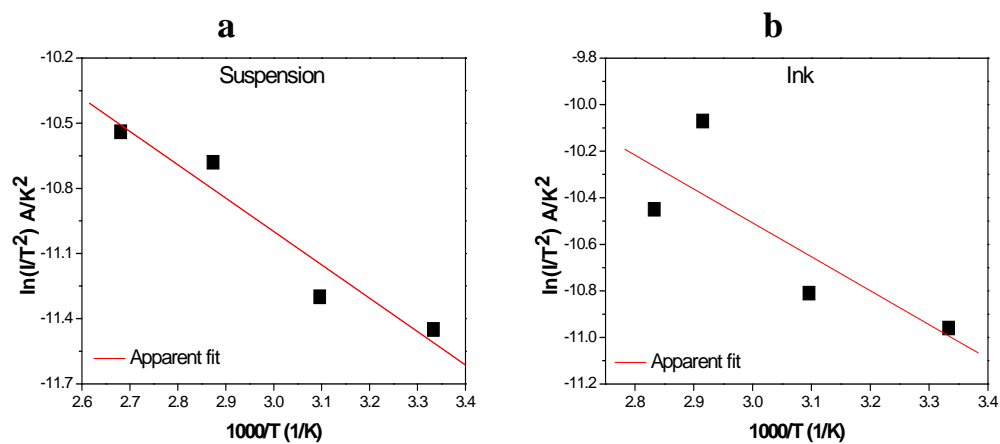

**S.I. Figure 4:** Plots of  $\ln(I/T^2)$  vs.  $1000/T$  for a) the suspension and b) the ink sample. The value of  $A^*$  (Richardson's constant) was determined from the intercept at the ordinate of the plot of  $\ln(I/T^2)$  vs.  $1000/T$
